# Supplementary material for: The Detection of Colorectal Cancer through Machine Learning-Based Breath Sensor Analysis
Source: MDPI journal article supplement (doi:10.3390/diagnostics13213355), 2023-10-31
Supplement: s1 [file s1]

# Supplementary Materials

**Table S1.** Classification results in feature subset of all data set, feature selection using greedy forward selection.

| Classification method | Number of features | Overall Accuracy | Sensitivity | Specificity | AUC ROC |
|-----------------------|--------------------|------------------|-------------|-------------|---------|
| C4.5                  | 3                  | 75.9%            | 40.0%       | 94.7%       | 0.674   |
| Naive Bayes           | 4                  | 72.4%            | 40.0%       | 89.5%       | 0.711   |
| Neural Networks       | 5                  | 78.2%            | 43.3%       | 96.5%       | 0.735   |
| Random Forest         | 6                  | 73.6%            | 53.3%       | 84.2%       | 0.760   |

**Table S2.** Classification results in feature subset of all data set, feature selection using Evolutionary Search.

| Classification method | Number of features | Overall Accuracy | Sensitivity | Specificity | AUC ROC |
|-----------------------|--------------------|------------------|-------------|-------------|---------|
| C4.5                  | 54                 | 72.4%            | 53.3%       | 82.5%       | 0.654   |
| Naive Bayes           | 164                | 48.3%            | 83.3%       | 29.8%       | 0.586   |
| Neural Networks       | 73                 | 64.4%            | 43.3%       | 75.4%       | 0.685   |
| Random Forest         | 75                 | 79.3%            | 53.3%       | 93.0%       | 0.734   |

**Table S3.** Classification in the full GNP sensor set.

| Classification method | Number of features | Overall Accuracy | Sensitivity | Specificity | AUC ROC |
|-----------------------|--------------------|------------------|-------------|-------------|---------|
| C4.5                  | 145                | 67.0%            | 40.0%       | 84.9%       | 0.566   |
| Naive Bayes           | 145                | 59.1%            | 45.7%       | 67.9%       | 0.637   |
| Neural Networks       | 145                | 60.2%            | 42.9%       | 71.7%       | 0.603   |
| Random Forest         | 145                | 69.3%            | 34.3%       | 92.5%       | 0.727   |

**Table S4.** Classification in the full MOX sensor set.

| Classification method | Number of features | Overall Accuracy | Sensitivity | Specificity | AUC ROC |
|-----------------------|--------------------|------------------|-------------|-------------|---------|
| C4.5                  | 135                | 49.4%            | 60.0%       | 43.9%       | 0.532   |
| Naive Bayes           | 135                | 39.1%            | 70.0%       | 22.8%       | 0.500   |
| Neural Networks       | 135                | 65.5%            | 43.3%       | 77.2%       | 0.616   |
| Random Forest         | 135                | 74.7%            | 50.0%       | 87.7%       | 0.655   |

**Table S5.** Classification in the GNP sensor subset, Greedy stepwise selection.

| Classification method | Number of features | Overall Accuracy | Sensitivity | Specificity | AUC ROC |
|-----------------------|--------------------|------------------|-------------|-------------|---------|
| C4.5                  | 5                  | 63.64%           | 31.4%       | 84.9%       | 0.641   |
| Naive Bayes           | 4                  | 71.59%           | 34.3%       | 96.2%       | 0.671   |
| Neural Networks       | 5                  | 67.0%            | 20.0%       | 98.1%       | 0.673   |
| Random Forest         | 7                  | 68.2%            | 45.7%       | 83.0%       | 0.779   |

**Table S6.** Classification in the GNP sensor subset, Evolutionary Search.

| <b>Classification method</b> | <b>Number of features</b> | <b>Overall Accuracy</b> | <b>Sensitivity</b> | <b>Specificity</b> | <b>AUC ROC</b> |
|------------------------------|---------------------------|-------------------------|--------------------|--------------------|----------------|
| C4.5                         | 49                        | 60.2%                   | 45.7%              | 69.8%              | 0.570          |
| Naive Bayes                  | 47                        | 63.6%                   | 25.7%              | 88.7%              | 0.653          |
| Neural Networks              | 30                        | 62.5%                   | 68.6%              | 58.5%              | 0.668          |
| Random Forest                | 30                        | 72.7%                   | 40.0%              | 94.3%              | 0.770          |

**Table S7.** Classification in the MOX sensor subset, Greedy stepwise selection.

| <b>Classification method</b> | <b>Number of features</b> | <b>Overall Accuracy</b> | <b>Sensitivity</b> | <b>Specificity</b> | <b>AUC ROC</b> |
|------------------------------|---------------------------|-------------------------|--------------------|--------------------|----------------|
| C4.5                         | 9                         | 77.0%                   | 63.3%              | 84.2%              | 0.759          |
| Naive Bayes                  | 3                         | 66.7%                   | 13.3%              | 94.7%              | 0.565          |
| Neural Networks              | 7                         | 62.1%                   | 40.0%              | 73.7%              | 0.582          |
| Random Forest                | 8                         | 72.4%                   | 56.7%              | 80.7%              | 0.685          |

**Table S8.** Classification in the MOX sensor subset, Evolutionary Search.

| <b>Classification method</b> | <b>Number of features</b> | <b>Overall Accuracy</b> | <b>Sensitivity</b> | <b>Specificity</b> | <b>AUC ROC</b> |
|------------------------------|---------------------------|-------------------------|--------------------|--------------------|----------------|
| C4.5                         | 43                        | 60.9%                   | 63.3%              | 59.6%              | 0.606          |
| Naive Bayes                  | 14                        | 63.2%                   | 13.3%              | 89.5%              | 0.579          |
| Neural Networks              | 52                        | 72.4%                   | 46.7%              | 86.0%              | 0.705          |
| Random Forest                | 57                        | 73.6%                   | 50.0%              | 86.0%              | 0.649          |

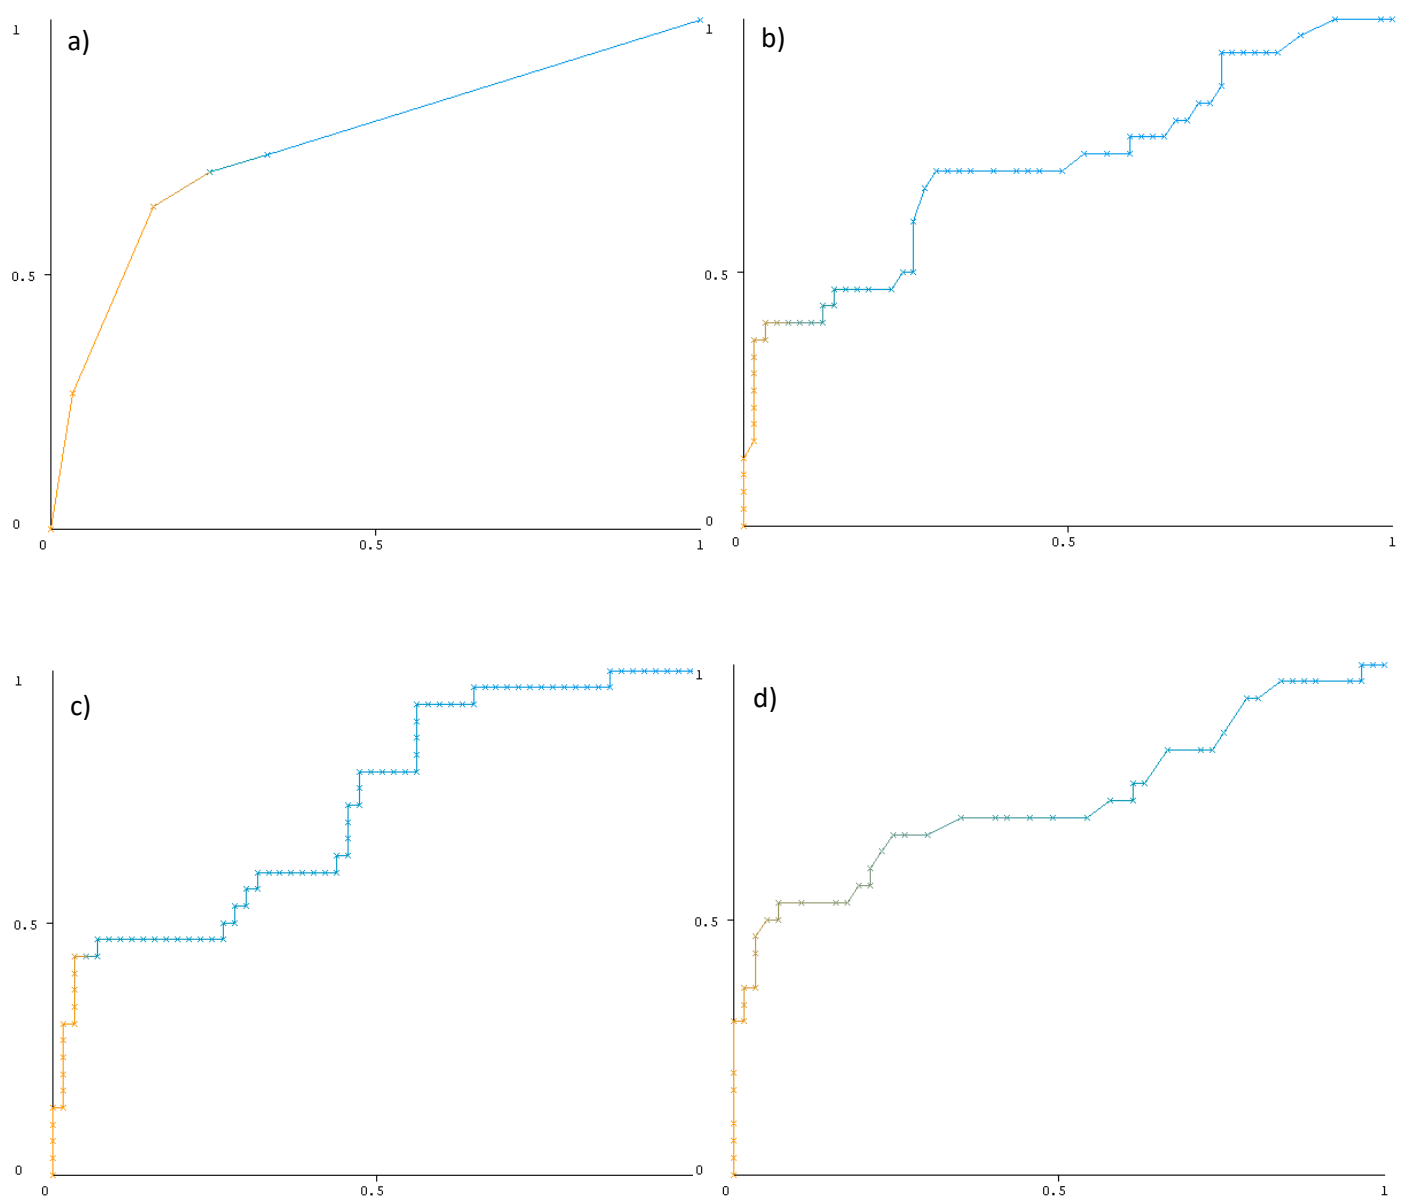

**Figure S1.** ROC curves of the best final classifiers: a) C4.5 (MOX sensors, greedy selection of features), b) Naïve Bayes (all sensors, greedy selection of features), c) Neural Network (all sensors, greedy selection of features), d) Random Forest (all, evolutionary search for features)
